# Supplementary material for: Conservation implications for endangered Euhadra murayamai, restricted to a large-scale limestone cliff: Insights from genome-wide SNP and morphological analyses
Source: Research Square preprint supplement (doi:10.21203/rs.3.rs-6022193/v1), 2025-10-30
Supplement: Supplementary file 1 [file 5604f2f38838e31874eeec5b.docx]

**Table 1**. Pairwise *FST* values between populations of *Euhadra murayamai* at different elevations and *E. quaesita* at Mt. Myojo at Mt. Kurohime.

|  | Low | Middle | Myojo |
| --- | --- | --- | --- |
| Middle | 0.226*** | - | - |
| Myojo | 0.315*** | 0.314*** | - |
| Kurohime | 0.287*** | 0.272*** | 0.103*** |
