# Supplementary material for: Conservation implications for endangered Euhadra murayamai, restricted to a large-scale limestone cliff: Insights from genome-wide SNP and morphological analyses
Source: Research Square preprint supplement (doi:10.21203/rs.3.rs-6022193/v1), 2025-10-30
Supplement: Supplementary file 2 [file c49995a2f55d5ae331783f35.docx]

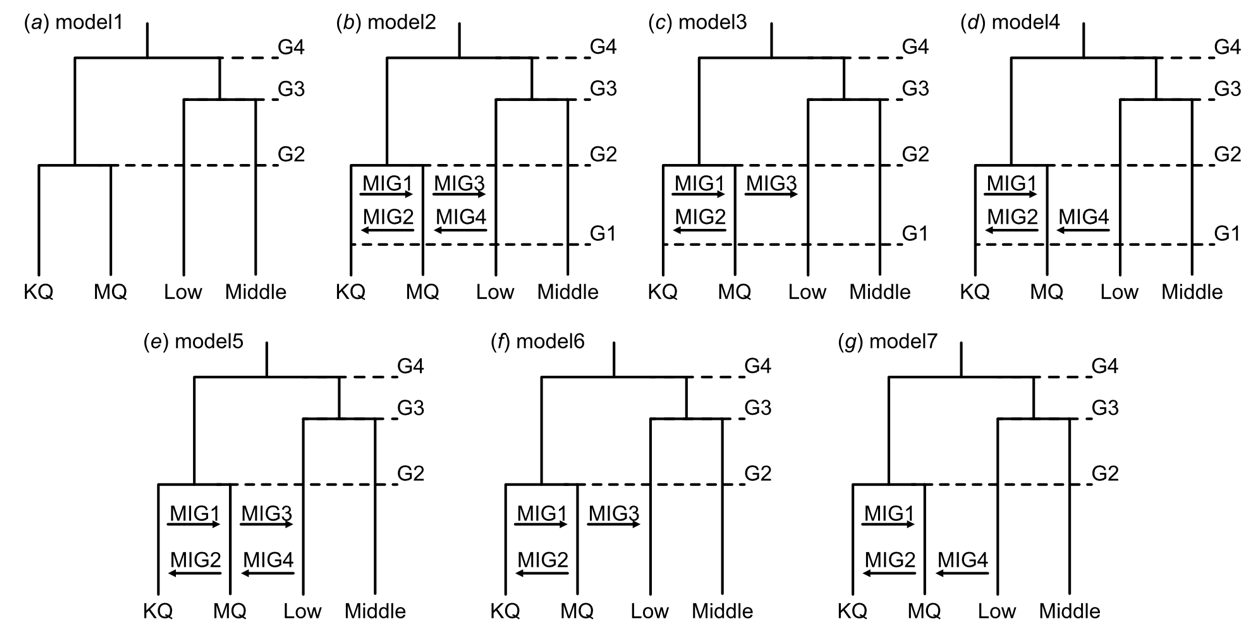


**Figure S1**. Illustration of the seven scenarios and parameters for Approximation Bayesian computation (ABC) analysis.

**Table S1**. Prior distribution for the simulation in Approximation Bayesian computation (ABC) analysis. *NKQ* (④), *NMQ* (⑤), *NLow* (⑥), *NMiddle* (⑦), *NancQ* (②), *NancM* (③), and *Nanc* (①) indicate the effective population sizes of the *Euhadra quaesita* at Mt. Kurohime, *E. quaesita* at Mt. Myojo, *E. murayamai* at low elevation, *E. murayamai* at middle elevation, the ancestor of *E. quaesita*, the ancestor of *E. murayamai*, and the common ancestor of all, respectively. *G1*, *G2*, *G3* and *G4* indicate the divergence times at each node. *MIG1* and *MIG2* represent the migration rate between branches of *E. quaesita* at Mt. Kurohime and Mt. Myojo. *MIG3* and *MIG4* represent the migration rate between branches of *E. quaesita* at Mt. Myojo and *E. murayamai* at low elevation. *MAF* is the minor allele frequency. Details of the parameters are shown in Figures 1 and S1.

| Parameters | Distribution | Lower | Upper |
| --- | --- | --- | --- |
| *NKQ* (④) | Log-uniform | 1000 | 10000000 |
| *NMQ* (⑤) | Log-uniform | 1000 | 10000000 |
| *NLow* (⑥) | Log-uniform | 1000 | 10000000 |
| *NMiddle* (⑦) | Log-uniform | 1000 | 10000000 |
| *NancQ* (②) | Log-uniform | 1000 | 10000000 |
| *NancM* (③) | Log-uniform | 1000 | 10000000 |
| *Nanc* (①) | Log-uniform | 1000 | 10000000 |
| *G1* | Log-uniform | 1000 | 1000000 |
| *G2* | Log-uniform | 1000 | 1000000 |
| *G3* | Log-uniform | 1000 | 1000000 |
| *G4* | Log-uniform | 1000 | 1000000 |
| *MIG1* | Log-uniform | 0.001 | 0.5 |
| *MIG2* | Log-uniform | 0.001 | 0.5 |
| *MIG3* | Log-uniform | 0.001 | 0.5 |
| *MIG4* | Log-uniform | 0.001 | 0.5 |
| *MAF* | Log-uniform | 0.0543478 | 0.4629630 |

**Table S2**. Summary of sequencing and *de novo* assembly.

| # | Sites | Species | Elevation | Raw  reads | Passed  reads | Clustered  loci | Coverage | Retained  clustered loci | Heterogeneity | Error  rate | Consensus  loci | ID | Accession# |
| --- | --- | --- | --- | --- | --- | --- | --- | --- | --- | --- | --- | --- | --- |
| 1 | Mt. Myojo | *Euhadra*  *murayamai* | Low | 3,533,072 | 3,497,450 | 148,738 | 23.5 | 83,144 | 0.009 | 0.005 | 66,333 | HC9017 | ######## |
| 2 | 1,676,436 | 1,660,082 | 127,077 | 13.1 | 61,604 | 0.009 | 0.005 | 51,481 | HC9019 | ######## |
| 3 | 1,963,013 | 1,943,617 | 125,621 | 15.5 | 63,211 | 0.01 | 0.005 | 52,087 | geo13 | ######## |
| 4 | 3,476,296 | 3,442,967 | 152,228 | 22.6 | 80,564 | 0.009 | 0.005 | 65,224 | geo14 | ######## |
| 5 | 5,339,444 | 5,287,942 | 162,470 | 32.5 | 90,937 | 0.009 | 0.004 | 72,495 | geo15 | ######## |
| 6 | 4,063,729 | 4,023,647 | 154,438 | 26.1 | 85,231 | 0.009 | 0.004 | 68,025 | geo16 | ######## |
| 7 | 3,025,934 | 2,996,825 | 145,936 | 20.5 | 77,107 | 0.009 | 0.004 | 62,501 | geo17 | ######## |
| 8 | 2,330,944 | 2,307,628 | 133,260 | 17.3 | 69,442 | 0.009 | 0.005 | 56,095 | geo18 | ######## |
| 9 | 1,950,137 | 1,931,522 | 123,907 | 15.6 | 62,785 | 0.01 | 0.005 | 51,350 | geoM1 | ######## |
| 10 | 1,988,775 | 1,968,974 | 125,456 | 15.7 | 63,406 | 0.01 | 0.005 | 51,903 | geoM2 | ######## |
| 11 | 2,344,703 | 2,322,318 | 136,255 | 17.0 | 69,461 | 0.01 | 0.004 | 56,240 | kagawa04 | ######## |
| 12 | 926,588 | 916,848 | 110,624 | 8.3 | 32,740 | 0.013 | 0.006 | 26,636 | nanpeki1 | ######## |
| 13 | 3,587,900 | 3,548,165 | 164,726 | 21.5 | 82,711 | 0.009 | 0.005 | 65,568 | nanpeki10 | ######## |
| 14 | 1,366,768 | 1,353,436 | 126,360 | 10.7 | 48,977 | 0.011 | 0.005 | 39,913 | nanpeki15 | ######## |
| 15 | 1,910,500 | 1,889,638 | 128,825 | 14.7 | 62,880 | 0.01 | 0.005 | 51,228 | nanpeki16 | ######## |
| 16 | 1,841,200 | 1,821,345 | 138,265 | 13.2 | 62,674 | 0.01 | 0.005 | 51,118 | nanpeki17 | ######## |
| 17 | 3,168,653 | 3,137,876 | 166,106 | 18.9 | 79,103 | 0.009 | 0.005 | 63,113 | nanpeki2 | ######## |
| 18 | 4,497,977 | 4,453,943 | 198,040 | 22.5 | 85,425 | 0.009 | 0.005 | 68,135 | nanpeki3 | ######## |
| 19 | 1,988,756 | 1,967,823 | 134,878 | 14.6 | 63,117 | 0.01 | 0.005 | 51,766 | nanpeki4 | ######## |
| 20 | 2,112,522 | 2,091,715 | 144,268 | 14.5 | 66,038 | 0.01 | 0.005 | 53,415 | nanpeki5 | ######## |
| 21 | 2,796,558 | 2,767,338 | 163,609 | 16.9 | 75,364 | 0.01 | 0.005 | 59,592 | nanpeki7 | ######## |
| 22 | 3,076,169 | 3,045,842 | 163,402 | 18.6 | 77,361 | 0.009 | 0.005 | 62,273 | nanpeki8 | ######## |
| 23 | 1,690,376 | 1,672,944 | 132,643 | 12.6 | 57,801 | 0.01 | 0.005 | 47,613 | nanpeki9 | ######## |
| 24 | 2,341,310 | 2,318,173 | 129,746 | 17.9 | 69,093 | 0.01 | 0.004 | 56,143 | shiiku1 | ######## |
| 25 | 2,673,517 | 2,647,917 | 141,521 | 18.7 | 74,117 | 0.01 | 0.004 | 59,576 | shiiku2 | ######## |
| 26 | 3,329,097 | 3,296,449 | 138,399 | 23.8 | 80,004 | 0.01 | 0.004 | 63,919 | shiiku3 | ######## |
| 27 | 1,696,305 | 1,679,222 | 122,721 | 13.7 | 57,024 | 0.01 | 0.005 | 46,209 | shiiku4 | ######## |
| 28 | 2,050,040 | 2,029,860 | 125,472 | 16.2 | 64,414 | 0.01 | 0.005 | 52,119 | shiiku5 | ######## |
| 29 | 3,223,037 | 3,184,847 | 151,795 | 21.0 | 80,053 | 0.01 | 0.005 | 62,596 | shiiku6 | ######## |
| 30 | Middle | 4,378,807 | 4,335,935 | 181,587 | 23.9 | 85,401 | 0.009 | 0.004 | 68,143 | sakasa1 | ######## |
| 31 | 900,437 | 890,875 | 115,504 | 7.7 | 31,675 | 0.012 | 0.006 | 26,044 | sakasa10 | ######## |
| 32 | 1,840,258 | 1,820,841 | 144,231 | 12.6 | 62,470 | 0.009 | 0.005 | 52,957 | sakasa11 | ######## |
| 33 | 1,692,194 | 1,674,220 | 130,201 | 12.9 | 56,938 | 0.01 | 0.005 | 48,461 | sakasa12 | ######## |
| 34 | 1,166,771 | 1,155,096 | 117,487 | 9.8 | 44,554 | 0.01 | 0.005 | 37,716 | sakasa13 | ######## |
| 35 | *E. quaesita* | | 1,451,218 | 1,435,813 | 127,153 | 11.3 | 53,908 | 0.012 | 0.005 | 42,679 | HC7674 | ######## |
| 36 | 1,520,496 | 1,505,495 | 132,050 | 11.4 | 52,976 | 0.012 | 0.005 | 41,298 | HC7675 | ######## |
| 37 | 3,904,575 | 3,865,214 | 154,229 | 25.1 | 89,231 | 0.011 | 0.005 | 65,108 | HC7676 | ######## |
| 38 | 1,760,169 | 1,741,650 | 139,493 | 12.5 | 61,915 | 0.011 | 0.005 | 47,825 | HC7677 | ######## |
| 39 | 4,849,861 | 4,803,864 | 182,228 | 26.4 | 93,563 | 0.011 | 0.004 | 67,346 | sanroku1 | ######## |
| 40 | 1,163,256 | 1,152,167 | 119,400 | 9.6 | 40,731 | 0.013 | 0.006 | 31,992 | sanroku1_2 | ######## |
| 41 | Mt. Kurohime | *E. quaesita* | | 4,011,713 | 3,968,266 | 199,499 | 19.9 | 87,143 | 0.011 | 0.006 | 63,086 | K1-1 | ######## |
| 42 | 4,566,280 | 4,521,837 | 161,849 | 27.9 | 91,586 | 0.01 | 0.005 | 66,970 | K1-2 | ######## |
| 43 | 2,763,670 | 2,737,286 | 152,804 | 17.9 | 74,718 | 0.011 | 0.005 | 56,335 | K1-3 | ######## |
| 44 | 4,690,422 | 4,642,939 | 165,993 | 28.0 | 93,100 | 0.01 | 0.005 | 68,826 | SI0141 | ######## |
| 45 | 1,681,002 | 1,664,904 | 131,670 | 12.6 | 59,661 | 0.011 | 0.004 | 46,506 | SI0142 | ######## |
| 46 | 4,253,155 | 4,210,791 | 156,646 | 26.9 | 90,229 | 0.01 | 0.004 | 66,356 | SI0143 | ######## |
| 47 | 2,762,045 | 2,734,077 | 141,678 | 19.3 | 79,649 | 0.01 | 0.004 | 59,946 | SI0144 | ######## |
| 48 | 1,695,152 | 1,678,527 | 129,956 | 12.9 | 57,477 | 0.012 | 0.005 | 44,471 | geo1 | ######## |
| 49 | 1,305,659 | 1,293,244 | 122,942 | 10.5 | 45,216 | 0.013 | 0.006 | 34,948 | geo10 | ######## |
| 50 | 1,230,858 | 1,218,342 | 118,753 | 10.3 | 43,212 | 0.013 | 0.006 | 33,413 | geo11 | ######## |
| 51 | 3,768,695 | 3,732,245 | 157,495 | 23.7 | 85,186 | 0.011 | 0.005 | 65,004 | geo12 | ######## |
| 52 | 3,294,859 | 3,262,810 | 139,891 | 23.3 | 80,776 | 0.009 | 0.005 | 62,972 | geo2 | ######## |
| 53 | 3,808,013 | 3,770,831 | 150,671 | 25.0 | 86,946 | 0.011 | 0.005 | 63,594 | geo3 | ######## |
| 54 | 3,397,995 | 3,365,510 | 151,618 | 22.2 | 80,238 | 0.011 | 0.005 | 59,948 | geo4 | ######## |
| 55 | 1,604,583 | 1,588,838 | 129,313 | 12.3 | 54,435 | 0.012 | 0.006 | 41,669 | geo5 | ######## |
| 56 | 5,004,940 | 4,956,101 | 197,233 | 25.1 | 91,437 | 0.01 | 0.005 | 67,362 | geo6 | ######## |
| 57 | 2,429,613 | 2,405,517 | 135,847 | 17.7 | 72,221 | 0.011 | 0.005 | 54,877 | geo7 | ######## |
| 58 | 3,709,963 | 3,673,034 | 169,433 | 21.7 | 84,716 | 0.011 | 0.005 | 62,333 | geo8 | ######## |
| 59 | 4,736,683 | 4,690,452 | 161,834 | 29.0 | 91,598 | 0.011 | 0.005 | 66,976 | geo9 | ######## |

**Table S3.** Posterior model probabilities in Approximation Bayesian computation (ABC) analysis.

|  | Model1 | Model2 | Model3 | Model4 | Model5 | Model6 | Model7 |
| --- | --- | --- | --- | --- | --- | --- | --- |
| Posterior model  probabilities | 0.9998 | 0 | 0 | 0.0002 | 0 | 0 | 0 |

**Table S4.** Bayes factors in Approximation Bayesian computation (ABC) analysis. These represents the ratios of model probabilities in the rows to those in the columns. Models are shown in Figure S1.

|  | Model1 | Model2 | Model3 | Model4 | Model5 | Model6 | Model7 |
| --- | --- | --- | --- | --- | --- | --- | --- |
| Model1 | 1 | 1068079 | 22180180 | 4360.4 | 113139.4 | 523829.9 | 141573800 |
| Model2 | 0 | 1 | 20.8 | 0.004 | 0.11 | 0.49 | 132.5 |
| Model3 | 0 | 0.0482 | 1 | 0.0002 | 0.005 | 0.024 | 6.38 |
| Model4 | 0.0002 | 244.9 | 5086.7 | 1 | 25.9 | 120.1 | 32467.8 |
| Model5 | 0 | 9.4 | 196.0 | 0.038 | 1 | 4.6 | 1251.3 |
| Model6 | 0 | 2.0 | 42.3 | 0.008 | 0.22 | 1 | 270.2 |
| Model7 | 0 | 0.0075 | 0.157 | 0 | 0.0008 | 0.003 | 1 |

**Table S5.** Posterior distribution of the parameters of Model 1, which is the most plausible model.

| Parameters | Median | SD | 95% BCI | |
| --- | --- | --- | --- | --- |
| Lower (2.5%) | Upper (97.5%) |
| *NKQ* (④) | 2180483.50 | 2603382 | 66524.08 | 8598399.85 |
| *NMQ* (⑤) | 109321.5 | 1364461 | 23441.0 | 3568678.1 |
| *NLow* (⑥) | 56367.0 | 1081422 | 8864.0 | 2877963.0 |
| *NMiddle* (⑦) | 124725.00 | 1371588 | 16392.08 | 4735639.27 |
| *NancQ* (②) | 3073984.50 | 2838336 | 13215.08 | 9263577.88 |
| *NancM* (③) | 6055.5 | 261757.6 | 1133.0 | 443717.5 |
| *Nanc* (①) | 5826.00 | 14848.02 | 1183.80 | 54834.72 |
| *G2* | 14984.000 | 41620.38 | 5294.875 | 140636.375 |
| *G3* | 35205.00 | 66036.57 | 7365.55 | 220146.35 |
| *G4* | 85479.5 | 96029.62 | 12213.0 | 397933.3 |
| *MAF* | 0.14710850 | 0.1120551 | 0.05583763 | 0.43094717 |

SD: standard deviation

**Table S6.** Posterior distribution of the parameters for the rate of change in effective population size in Model 1, which is the most plausible model.

| The rate of change  effective population size | Median | SD | 95% BCI | | Probability of  more than 1.0 |
| --- | --- | --- | --- | --- | --- |
| Lower (2.5%) | Upper (97.5%) |
| ① → ② | 350.7 | 1062.9 | 6.30 | 3998.9 | 100 |
| ① → ③ | 0.96 | 149.8 | 0.06 | 112.3 | 49 |
| ② → ④ | 0.97 | 155.8 | 0.03 | 310.4 | 46 |
| ② → ⑤ | 0.05 | 10.8 | 0.006 | 12.8 | 16 |
| ③ → ⑥ | 6.39 | 305.3 | 0.33 | 239.48 | 93 |
| ③ → ⑦ | 18.0 | 120.7 | 0.20 | 163.5 | 94 |

SD: standard deviation

**Table S7.** Posterior distribution of the difference in effective population size between current populations. The differences represent the population size of the column minus that of row. Number outside brackets, numbers in round brackets and numbers in square brackets indicate the median, the probability of being greater than 0.0, and the 95% Bayesian confidence interval, respectively.

|  | *E. quaesita* at Mt. Kurohime | *E. quaesita* at Mt. Myojo | *E. murayamai* at a low elevation |
| --- | --- | --- | --- |
| *E. quaesita* at Mt. Myojo | 1781761.5 (92)  [-154930.5 – 8456854.3] | – | – |
| *E. murayamai* at a low elevation | 2121667.0 (93)  [-2811438.9 – 8562611.4] | 46219.0 (74)  [-1842438.0 – 3314126.0] | – |
| *E. murayamai* at a middle elevation | 1792899.5 (89)  [-781497.8 – 8393590.1] | 15834.5 (56)  [-4572221.1 – 3214494.3] | - 32559.0 (30)  [-4650818.1 – 2707938.0] |

**Table S8**. Result of the estimation of recent gene flow using BA3-SNPs. Bold values indicate statistical significance.

| From | To | Migration Rates | Significance |
| --- | --- | --- | --- |
| *E. murayamai* at the low elevation | ***E. murayamai* at the low elevation** | **0.9789±0.0143** | **Yes** |
| *E. murayamai* at the middle elevation | 0.0105±0.0101 | No |
| *E. quaesita* at Mt. Myojo | 0.0106±0.0104 | No |
| *E. murayamai* at the middle elevation | *E. murayamai* at the low elevation | 0.0415±0.0363 | No |
| ***E. murayamai* at the middle elevation** | **0.9162±0.0482** | **Yes** |
| *E. quaesita* at Mt. Myojo | 0.0423±0.0376 | No |
| *E. quaesita* at Mt. Myojo | *E. murayamai* at the low elevation | 0.0377±0.0335 | No |
| *E. murayamai* at the middle elevation | 0.0373±0.0328 | No |
| ***E. quaesita* at Mt. Myojo** | **0.9251±0.0438** | **Yes** |
